# Supplementary material for: Whole Language and Children's Literature (Major Figures in Reading).
Source: Atypon-hosted journal article supplement (doi:10.1176/appi.ps.201800346), 1992-01-01
Supplement: appi.ps.201800346.ds001.pdf [file appi.ps.201800346.ds001.pdf]

**Supplement Table 1** Risk of suicide death among individuals with mental health conditions

|                                    | <b>Sociodemographic-Adjusted Model *</b> |            |             |            |               |           |
|------------------------------------|------------------------------------------|------------|-------------|------------|---------------|-----------|
|                                    | <b>ALL</b>                               |            | <b>Male</b> |            | <b>Female</b> |           |
|                                    | AOR                                      | 95% CI     | AOR         | 95% CI     | AOR           | 95% CI    |
| <b>Anxiety Disorder</b>            | 3.94                                     | 3.54–4.38  | 5.15        | 4.54–5.85  | 4.62          | 3.77–5.66 |
| <b>ADHD</b>                        | 1.34                                     | 0.99–1.82  | 1.19        | 0.83–1.69  | 1.59          | 0.87–2.91 |
| <b>Bipolar Disorder</b>            | 6.15                                     | 5.09–7.41  | 6.34        | 4.92–8.17  | 9.95          | 7.39–13.4 |
| <b>Depressive Disorders</b>        | 5.17                                     | 4.71–5.66  | 6.85        | 6.15–7.64  | 7.21          | 5.96–8.72 |
| <b>Schizophrenia Spectrum</b>      | 8.66                                     | 6.16–12.19 | 6.94        | 4.52–10.68 | 15.74         | 8.95–27.7 |
| <b>Any of the listed condition</b> | 5.09                                     | 4.65–5.56  | 6.24        | 5.63–6.92  | 7.85          | 6.45–9.55 |

\* Adjusted for age, insurance type, poverty level, education level, and substance use disorders (SUD)

**Supplement Table 2** Risk of suicide death among individuals with mental health conditions

|                                    | <b>Full-Adjusted Model *</b> |           |             |           |               |            |
|------------------------------------|------------------------------|-----------|-------------|-----------|---------------|------------|
|                                    | <b>ALL</b>                   |           | <b>Male</b> |           | <b>Female</b> |            |
|                                    | AOR                          | 95% CI    | AOR         | 95% CI    | AOR           | 95% CI     |
| <b>Anxiety Disorder</b>            | 2.01                         | 1.79–2.26 | 2.45        | 2.13–2.82 | 2.05          | 1.64–2.55  |
| <b>ADHD</b>                        | 0.73                         | 0.53–0.99 | 0.59        | 0.41–0.86 | 0.72          | 0.39–1.33  |
| <b>Bipolar Disorder</b>            | 3.62                         | 2.99–4.39 | 3.16        | 2.42–4.13 | 6.14          | 4.56–8.27  |
| <b>Depressive Disorders</b>        | 4.05                         | 3.66–4.47 | 5.16        | 4.58–5.82 | 5.48          | 4.47–6.71  |
| <b>Schizophrenia Spectrum</b>      | 4.71                         | 3.31–6.70 | 4.10        | 2.61–6.45 | 5.95          | 3.25–10.92 |
| <b>Any of the listed condition</b> | --                           |           | --          |           | --            |            |

\* Full-adjusted model included all listed mental health conditions (anxiety disorder, ADHD, Bipolar disorder, depressive disorders, and schizophrenia spectrum), age, insurance type, poverty level, education level, and SUD
